# Supplementary figures and images for: Harnessing work-function-driven rotational steering for quantum state control in HCl dissociation on bimetallic alloys
Source: Royal Society of Chemistry journal article supplement (doi:10.1039/d6sc00201c), 2026-01-01

(a)

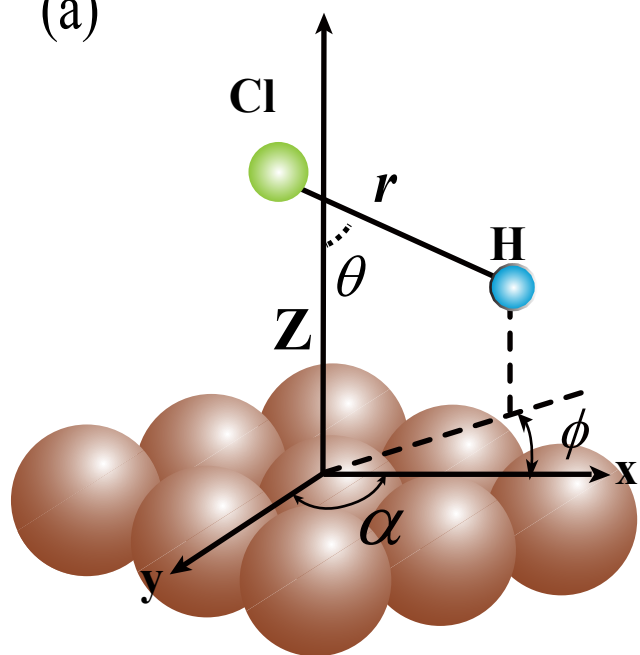

(b)

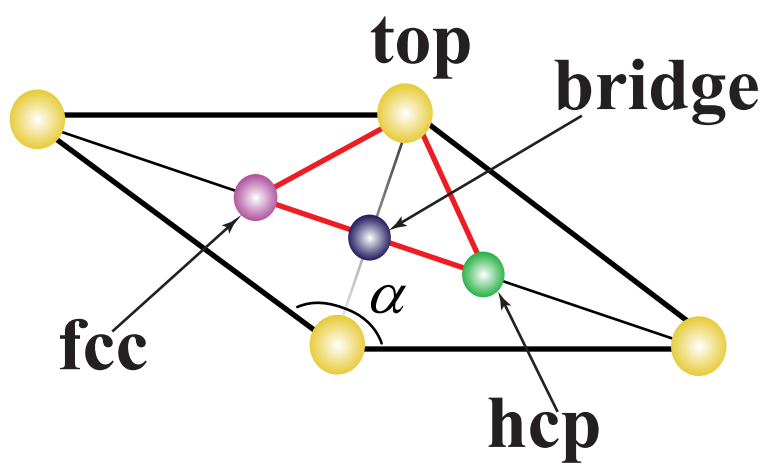

Supplement: d6sc00201c2.zip [file FigS1_coordinate.pdf › support/FigS1_coordinate.pdf]

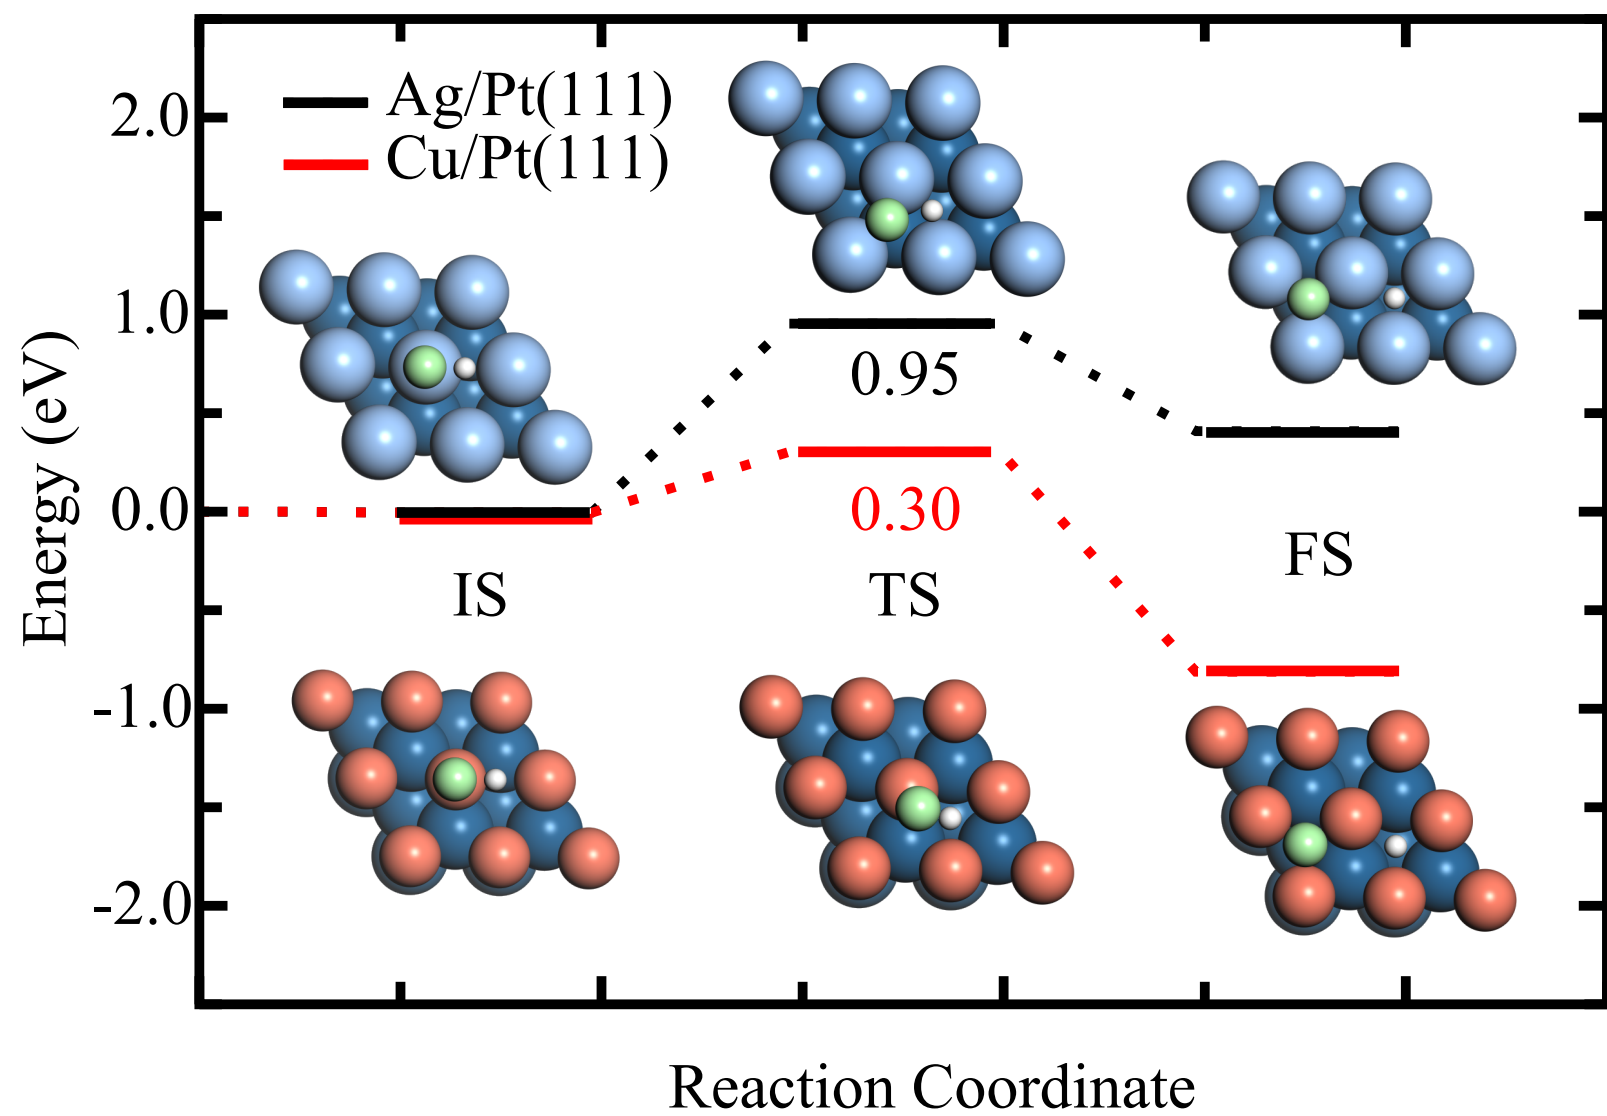

Supplement: d6sc00201c2.zip [file FigS2_cineb.pdf › support/FigS2_cineb.pdf]

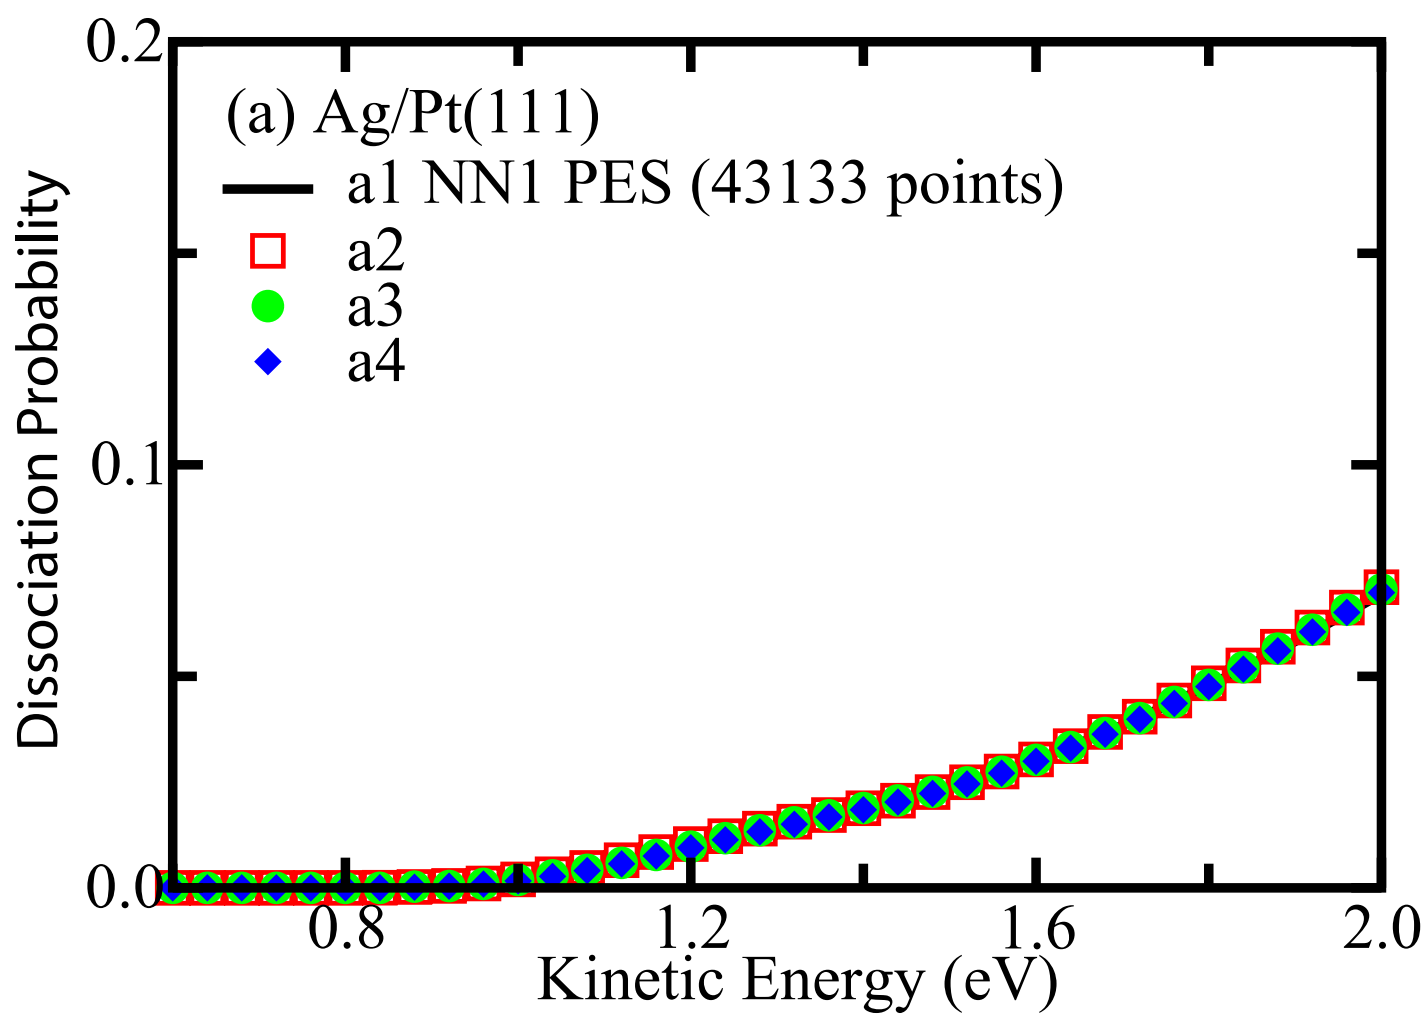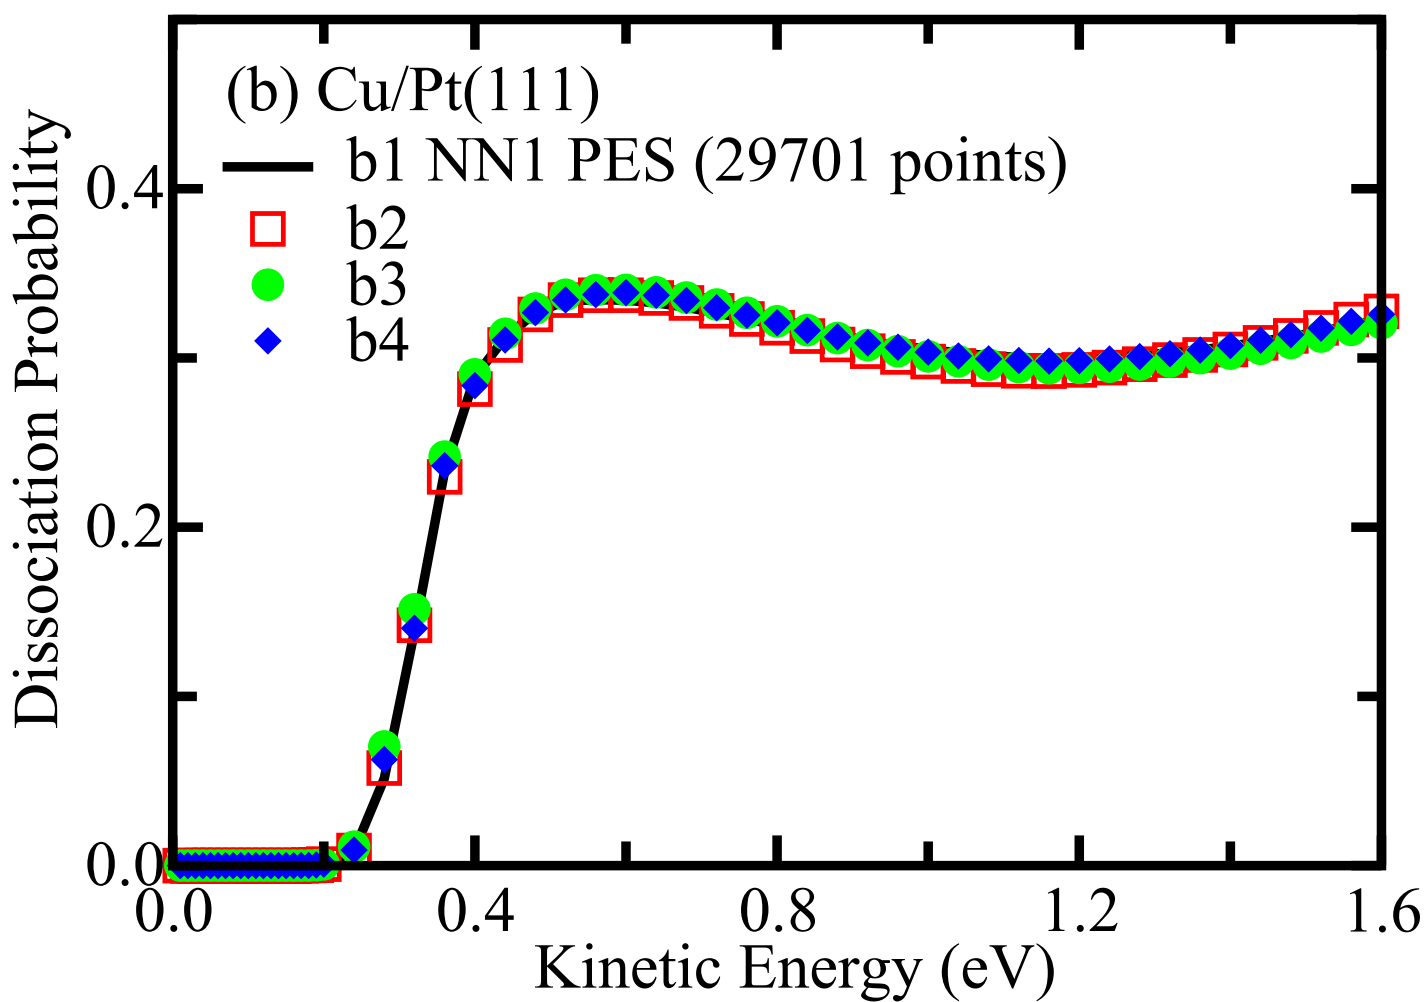

Supplement: d6sc00201c2.zip [file FigS3_pes_converg.pdf › support/FigS3_pes_converg.pdf]

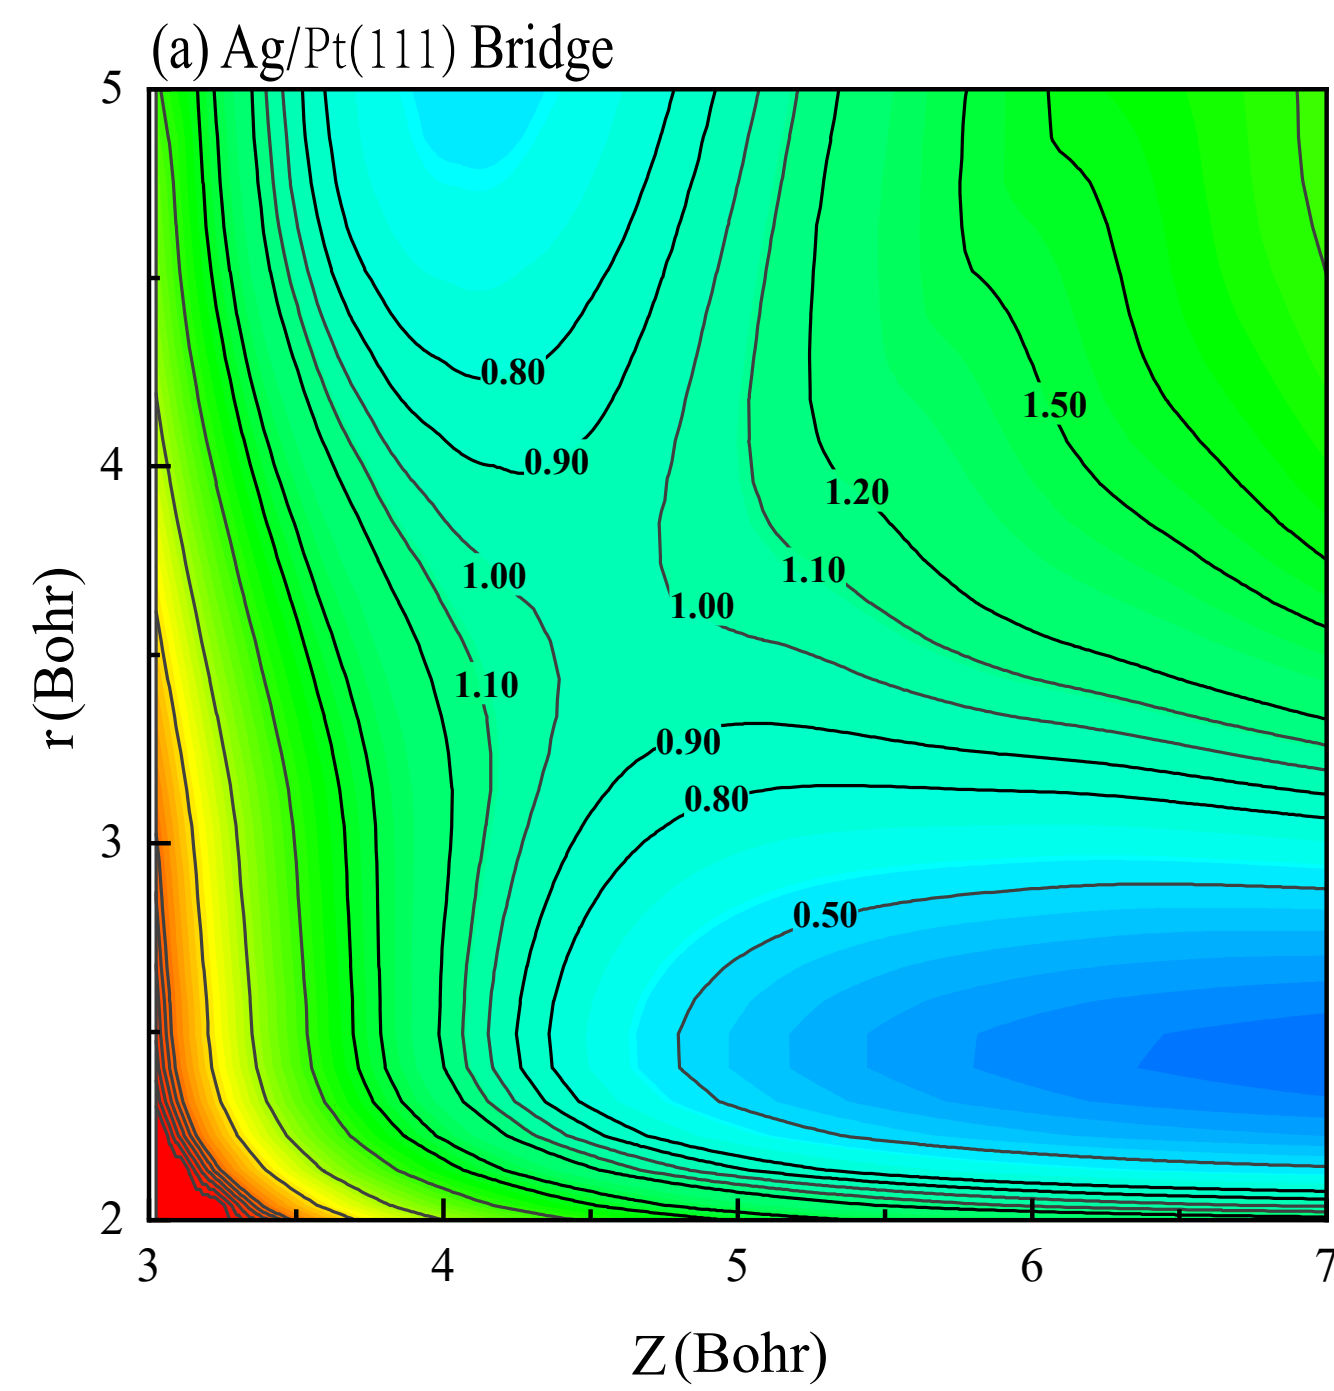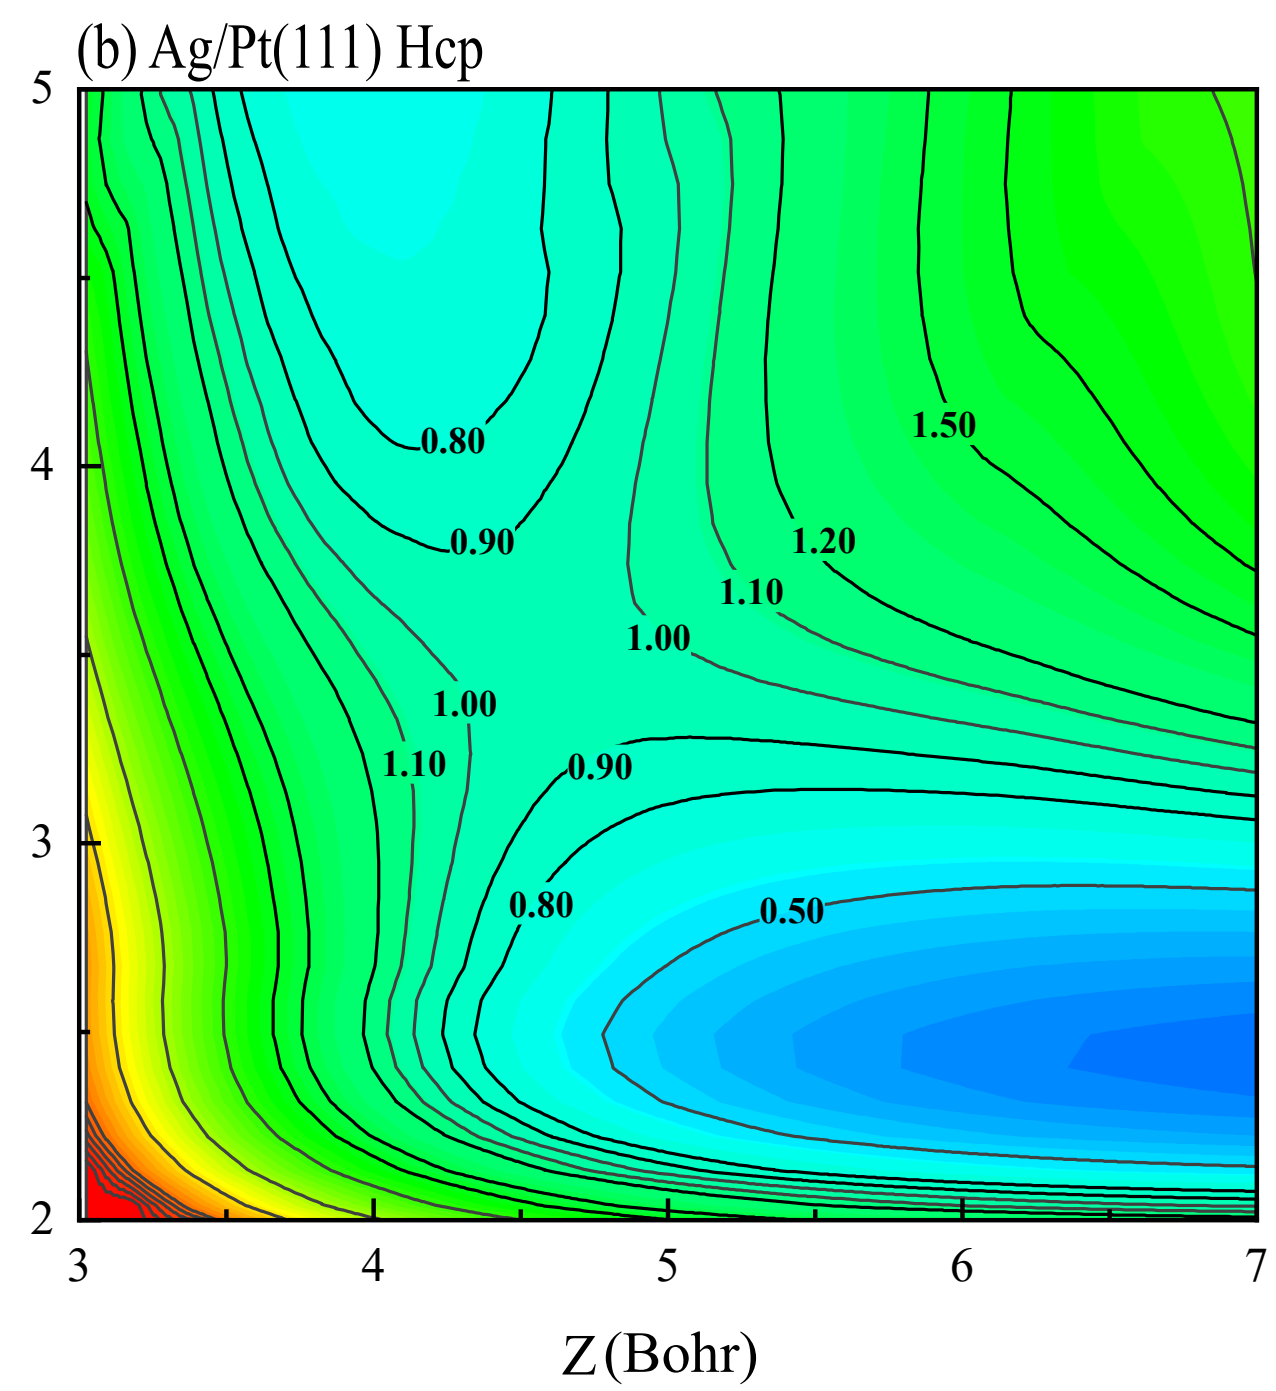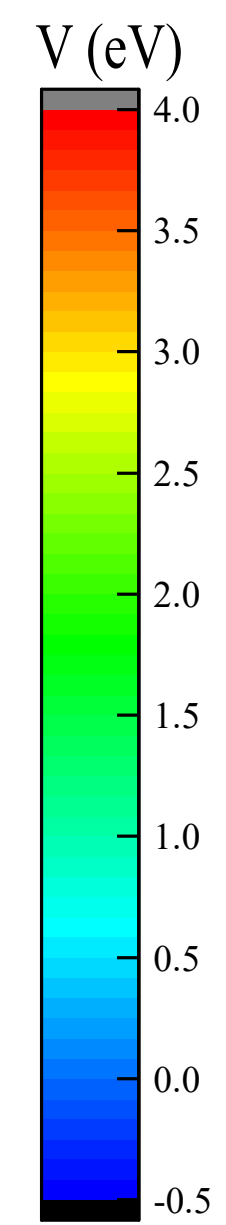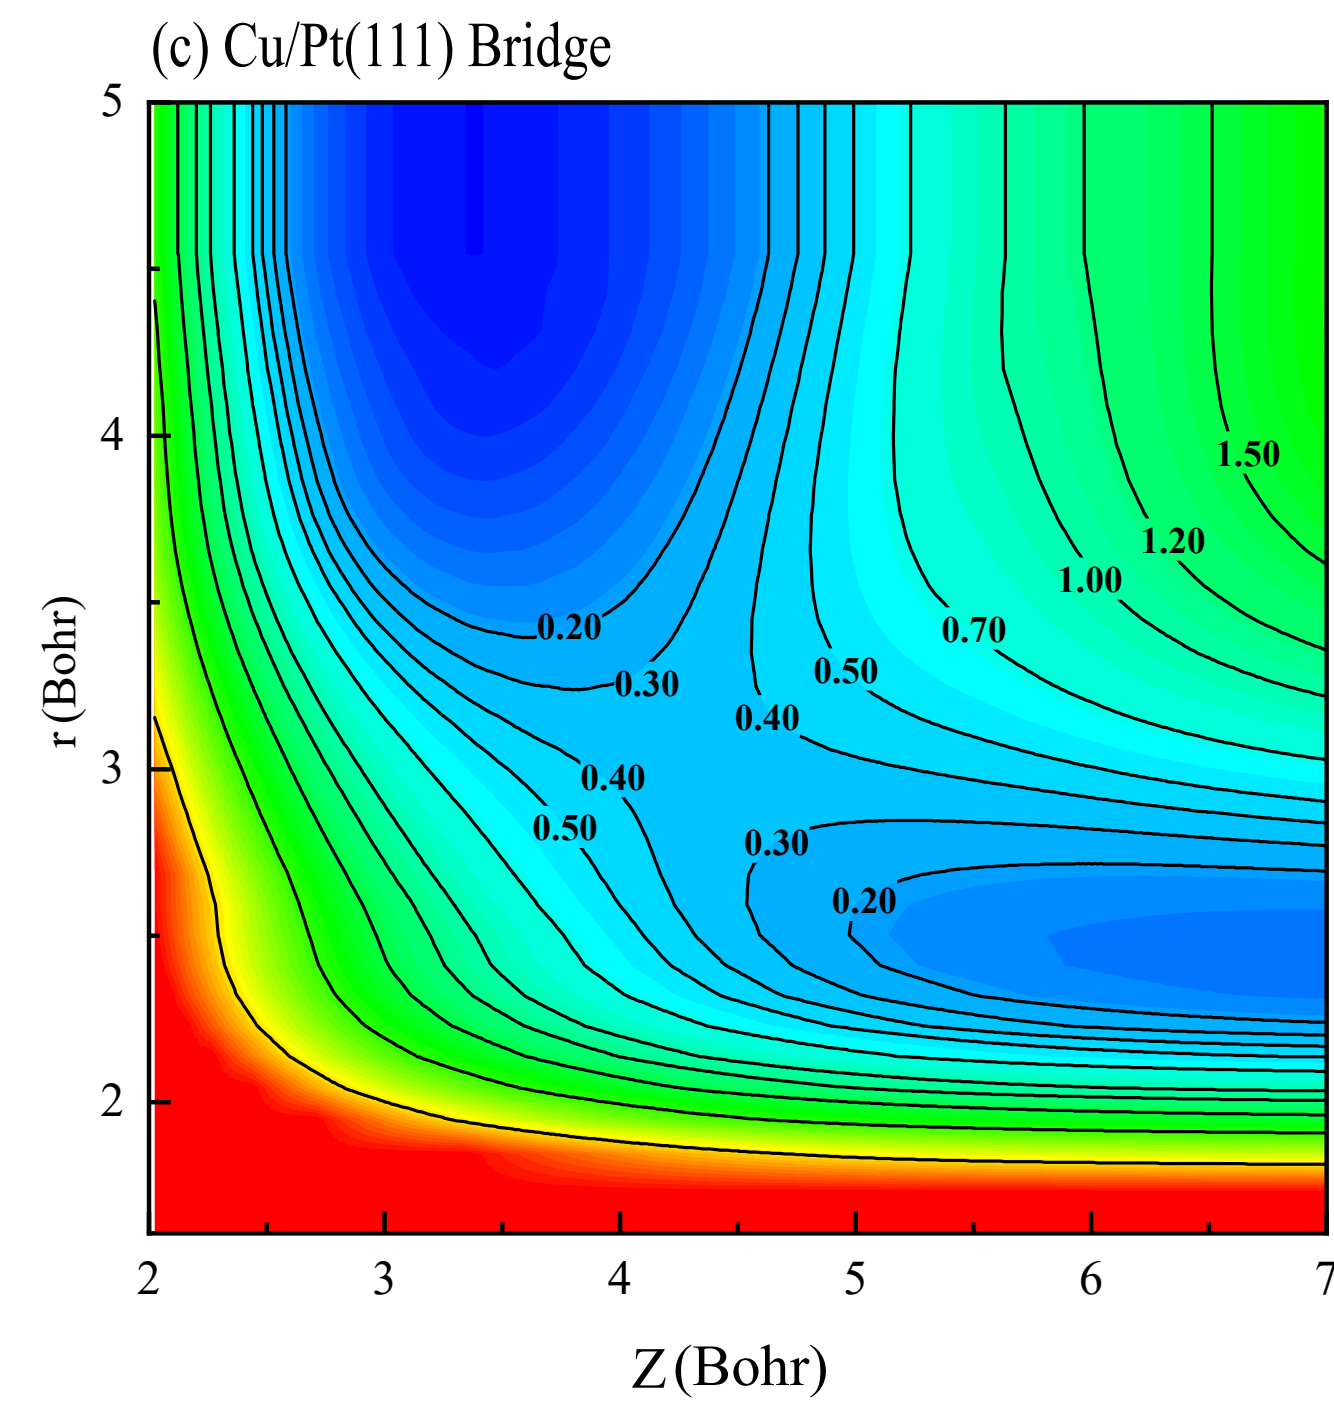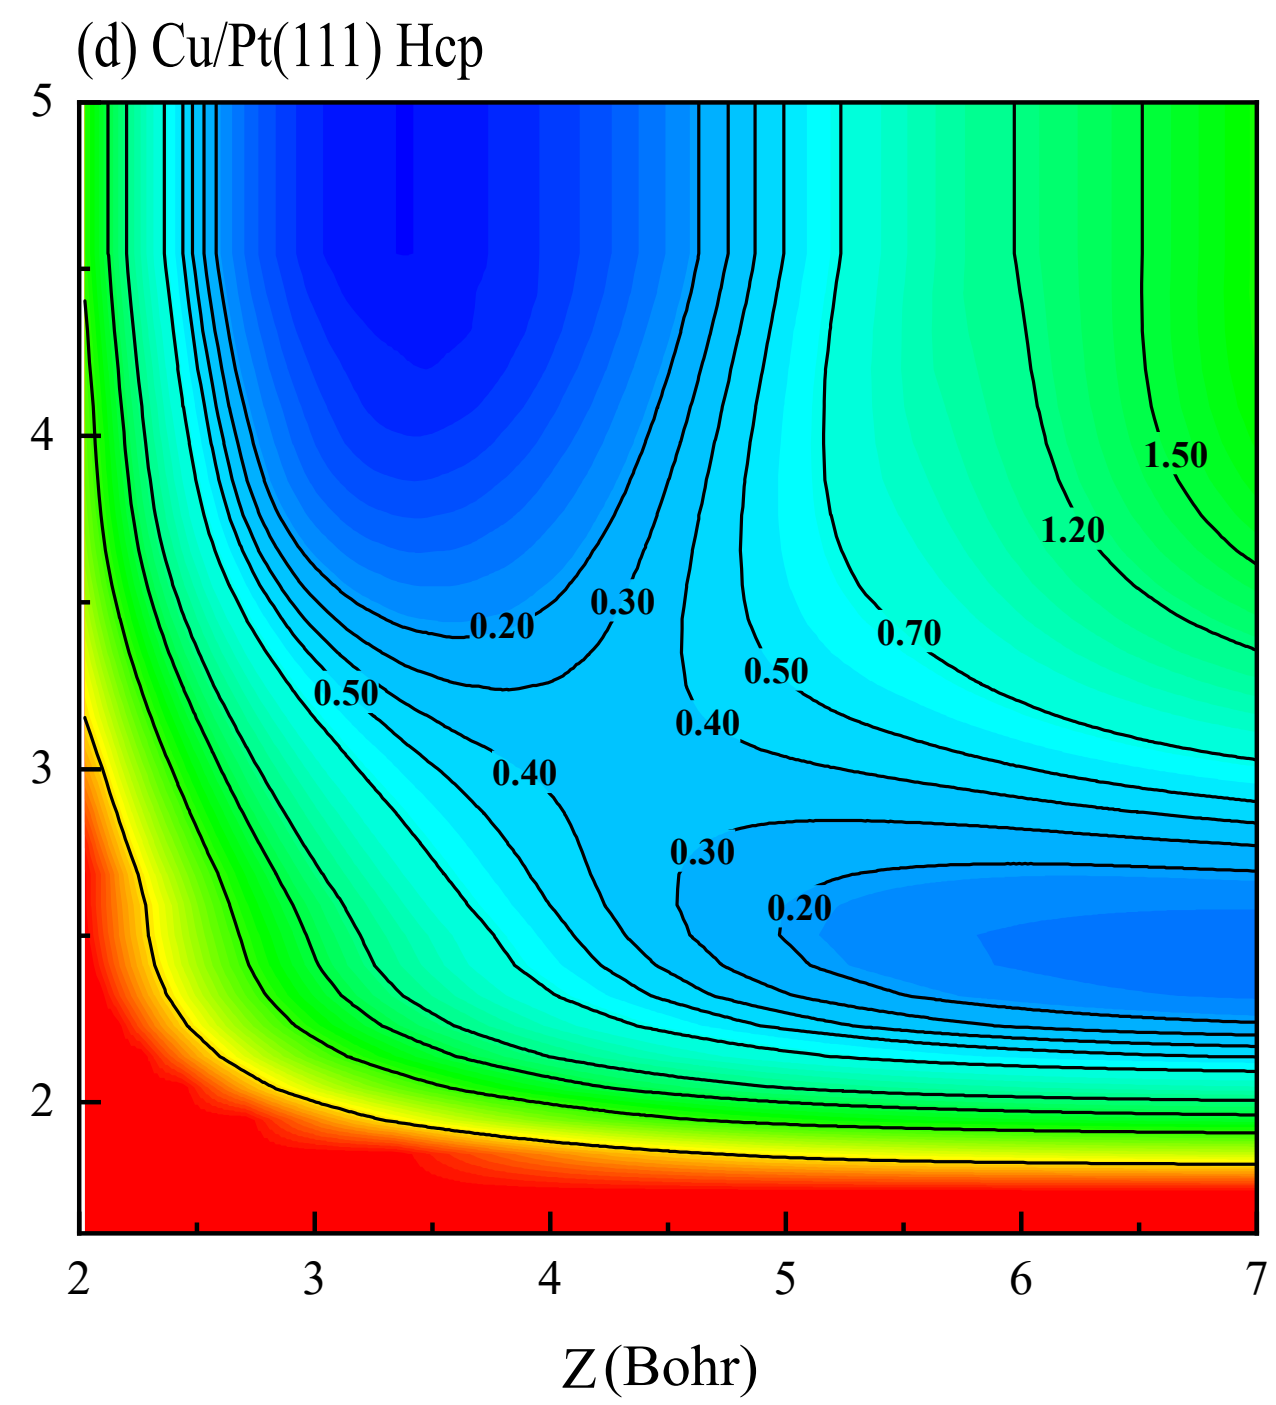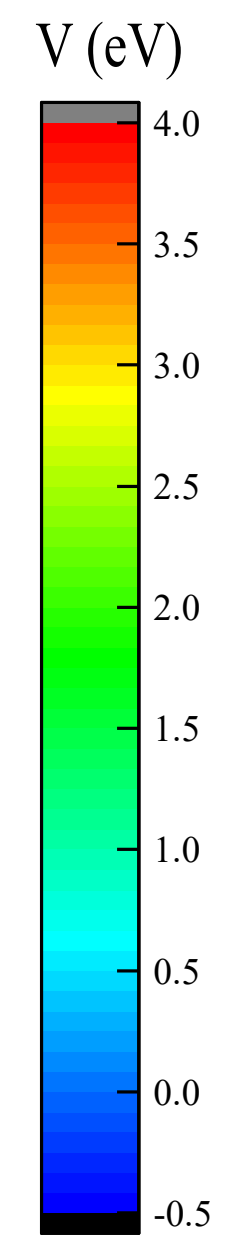

Supplement: d6sc00201c2.zip [file FigS4_2D_plot.pdf › support/FigS4_2D_plot.pdf]

Dissociation Probability

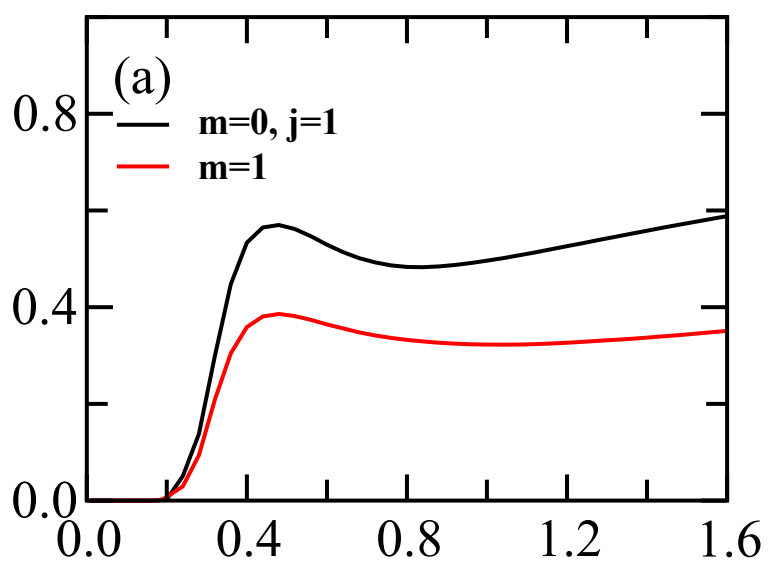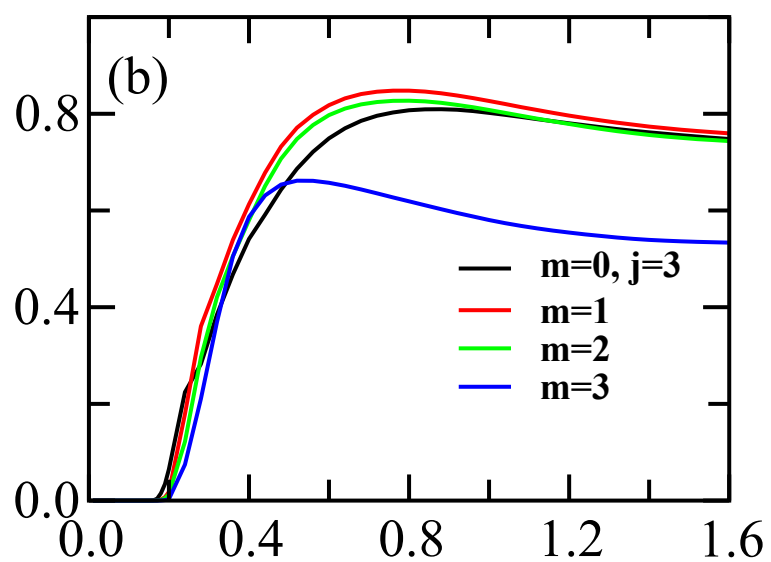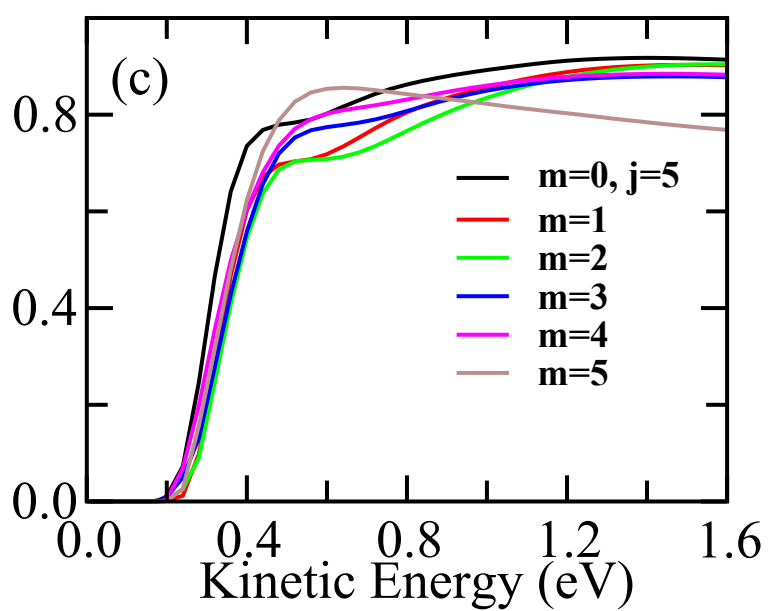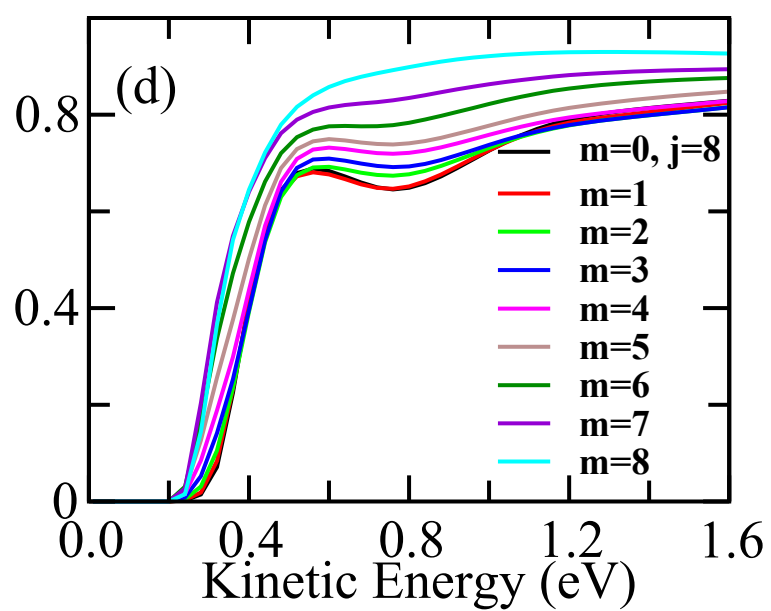

Supplement: d6sc00201c2.zip [file FigS5_oritation_j_CuPt.pdf › support/FigS5_oritation_j_CuPt.pdf]

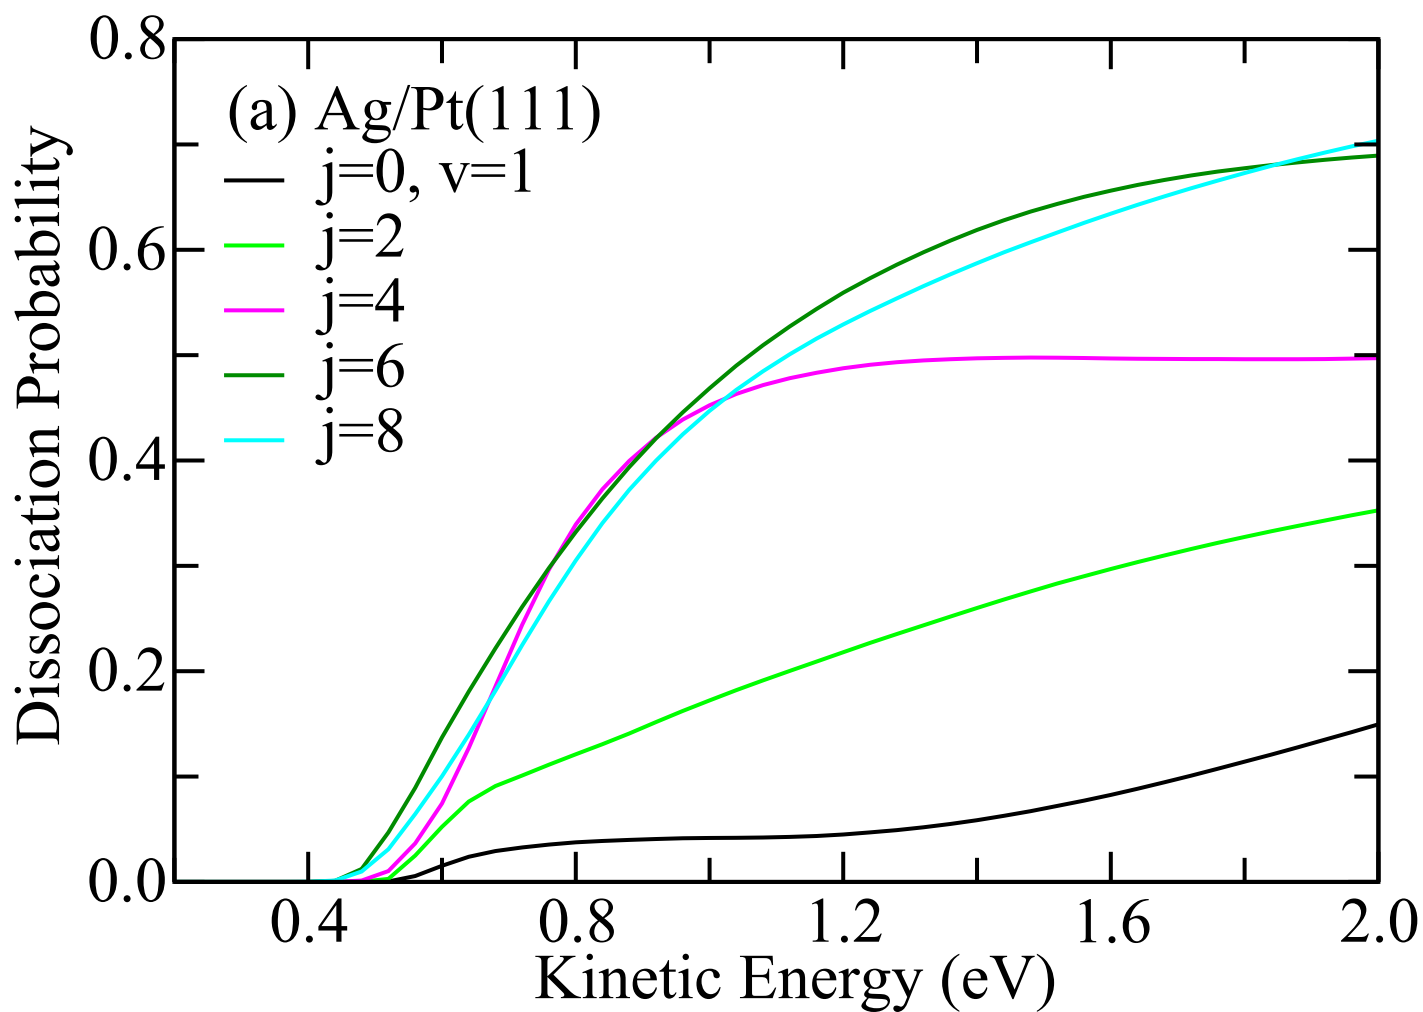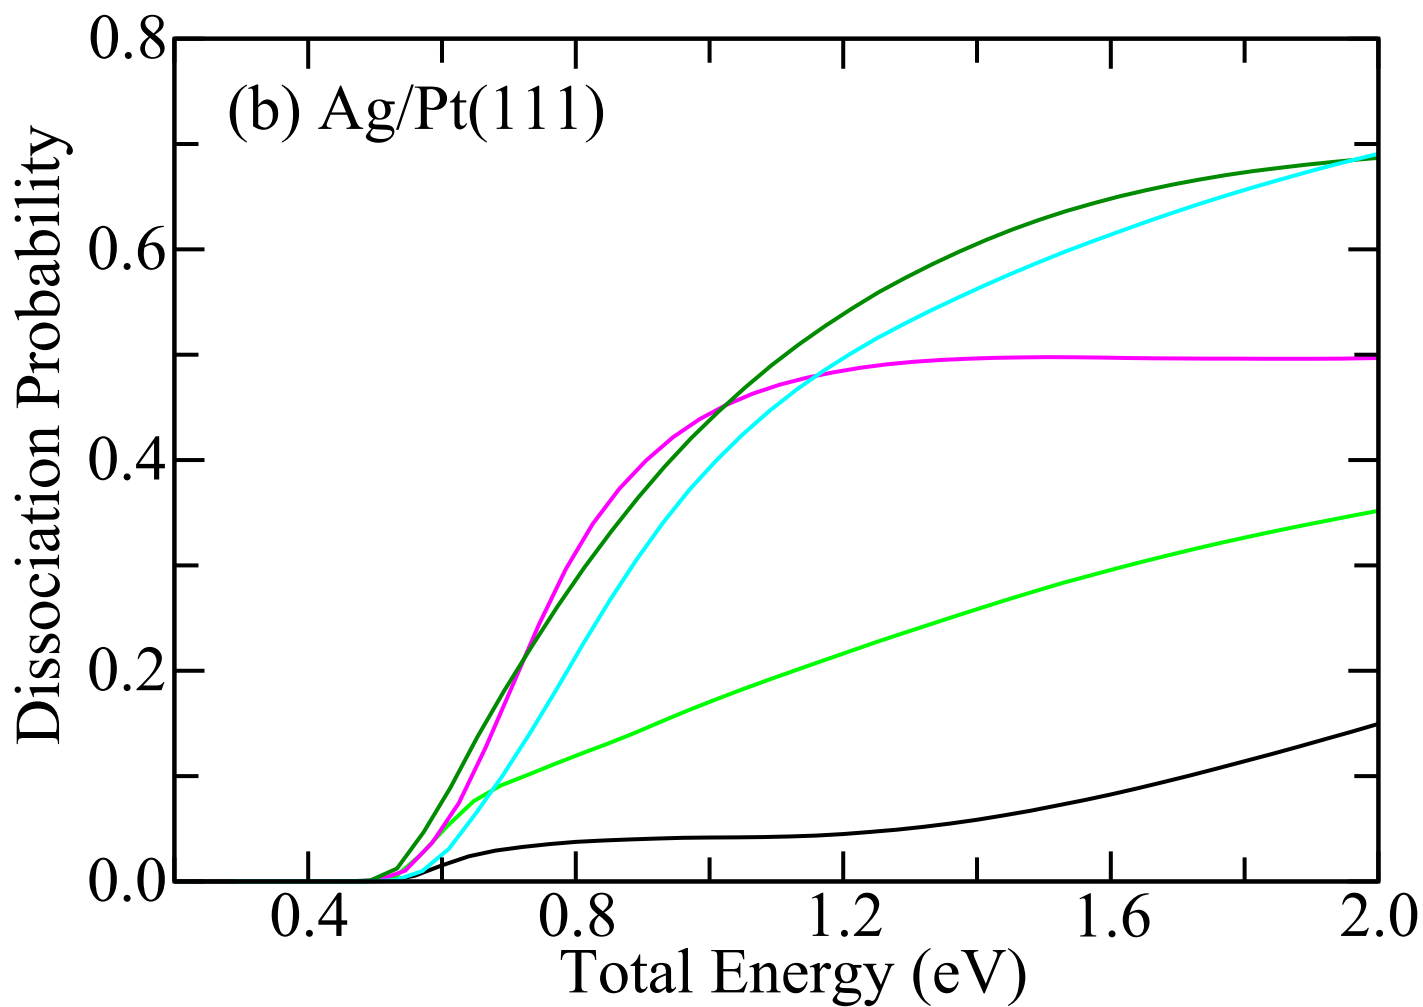

Supplement: d6sc00201c2.zip [file FigS6_AgPt_v1j.pdf › support/FigS6_AgPt_v1j.pdf]

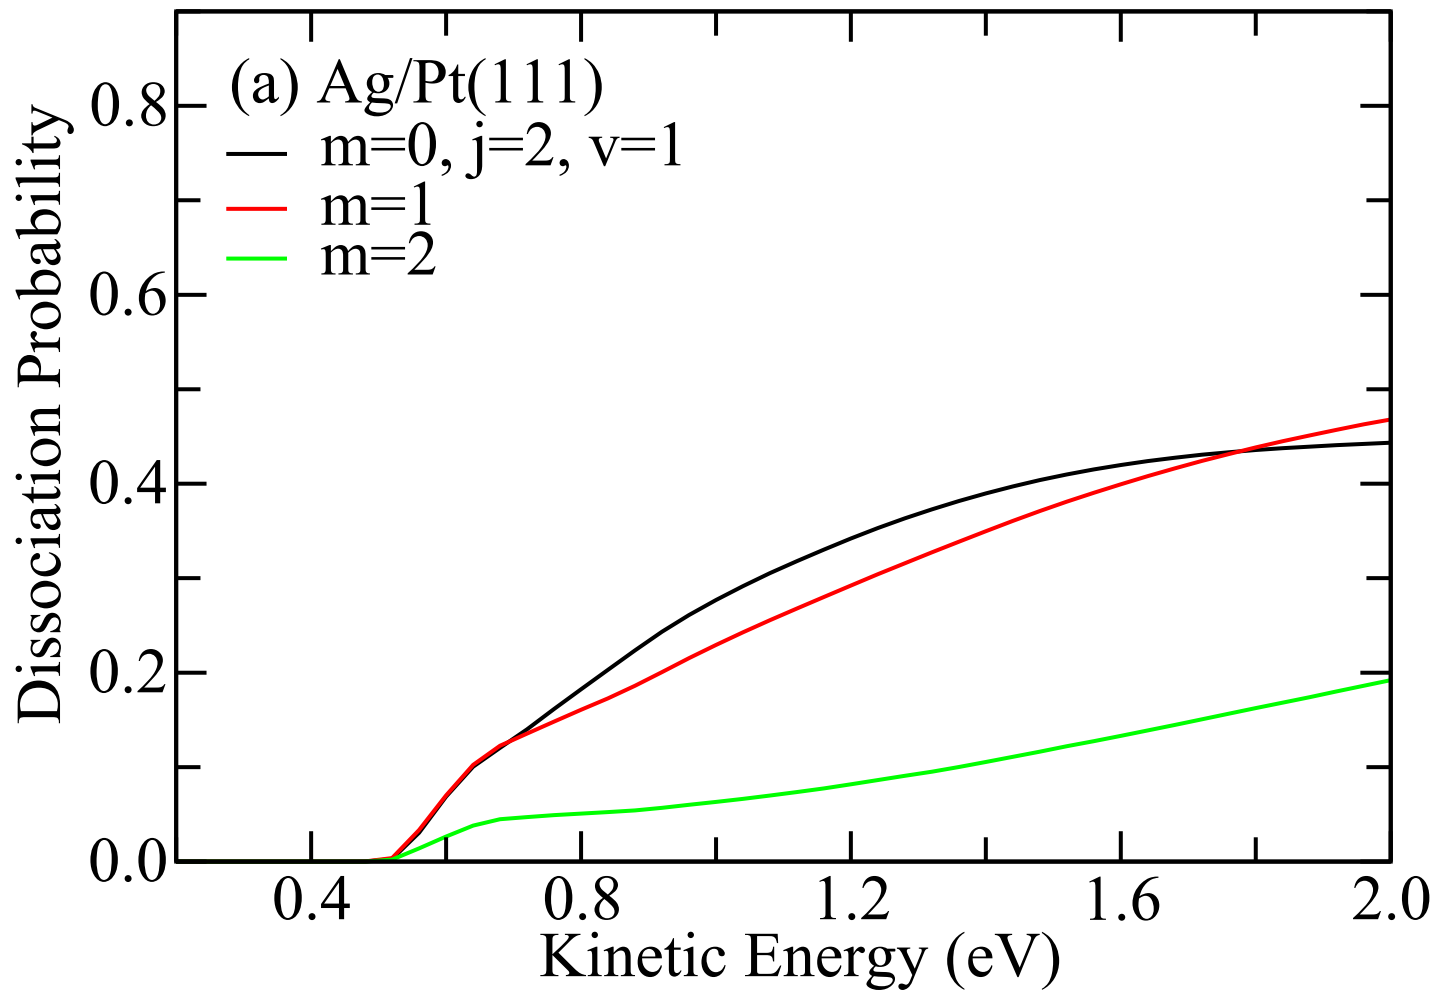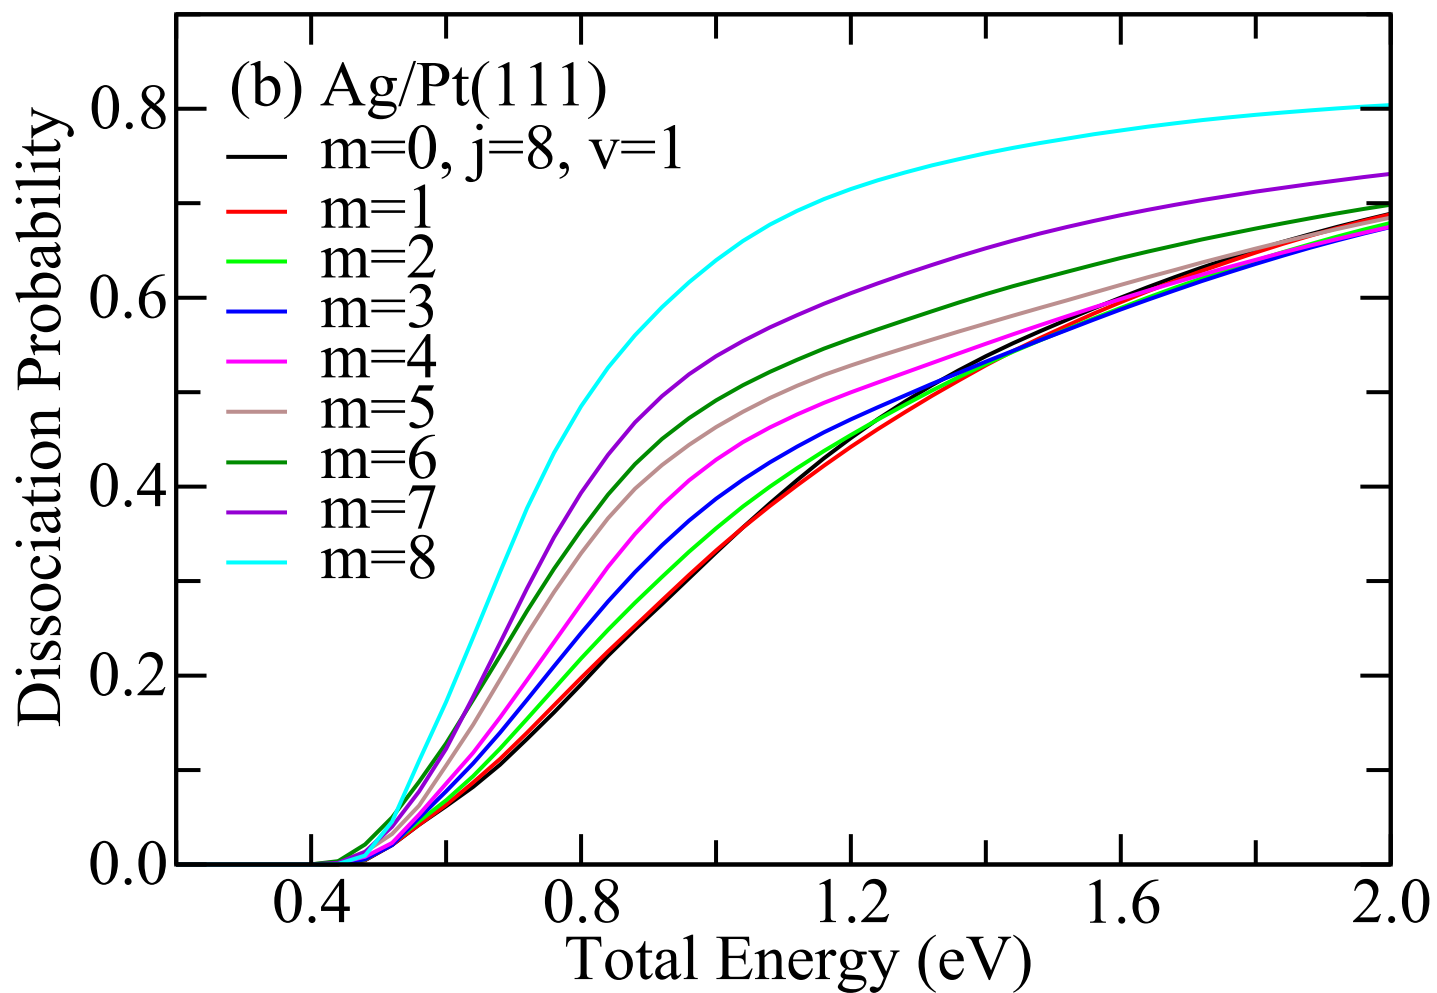

Supplement: d6sc00201c2.zip [file FigS7_AgPt_v1jm.pdf › support/FigS7_AgPt_v1jm.pdf]
